# Supplementary material for: Photosensitivity of Different Nanodiamond–PMO Nanoparticles in Two-Photon-Excited Photodynamic Therapy
Source: MDPI journal article supplement (doi:10.3390/life12122044), 2022-12-07
Supplement: s1 [file s1]

## Supplementary Information

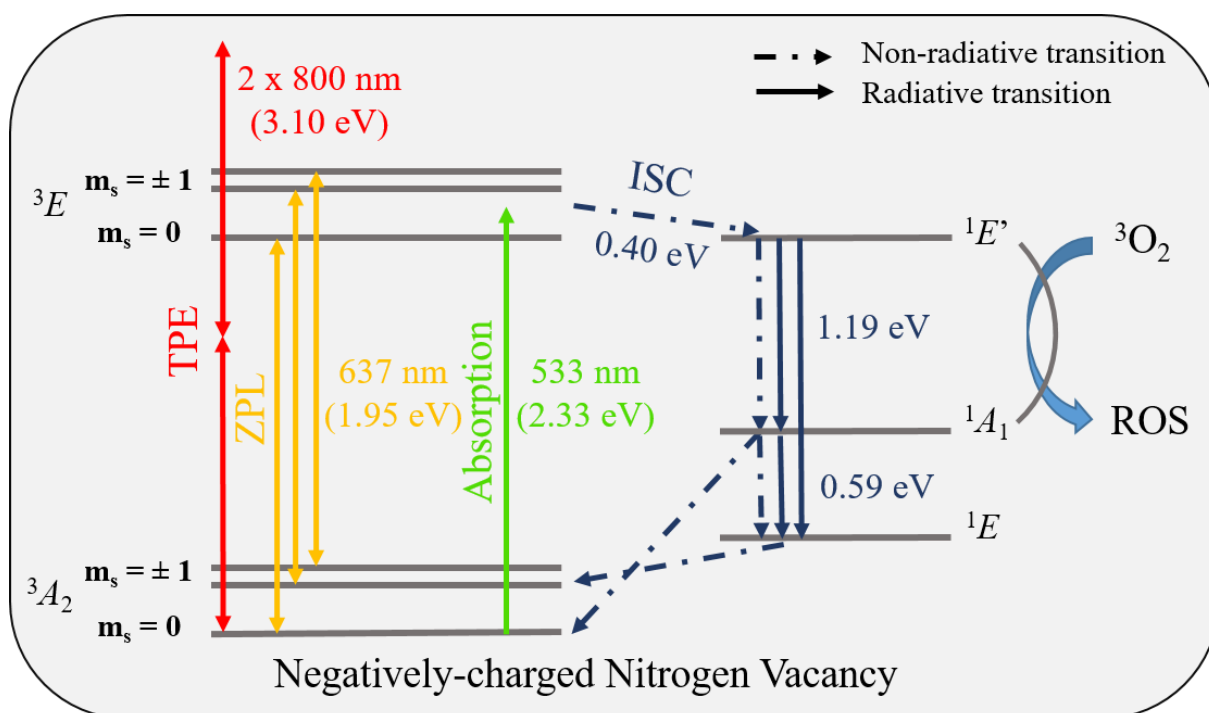

**Figure S1.** Energy-level diagram of negative nitrogen vacancy (NV<sup>-</sup>) centers contained in nanodiamonds. ISC: Intersystem Crossing; ROS: Reactive oxygen species; TPE: Two-photon excitation; ZPL: Zero-phonon line. Adapted from reference [1].

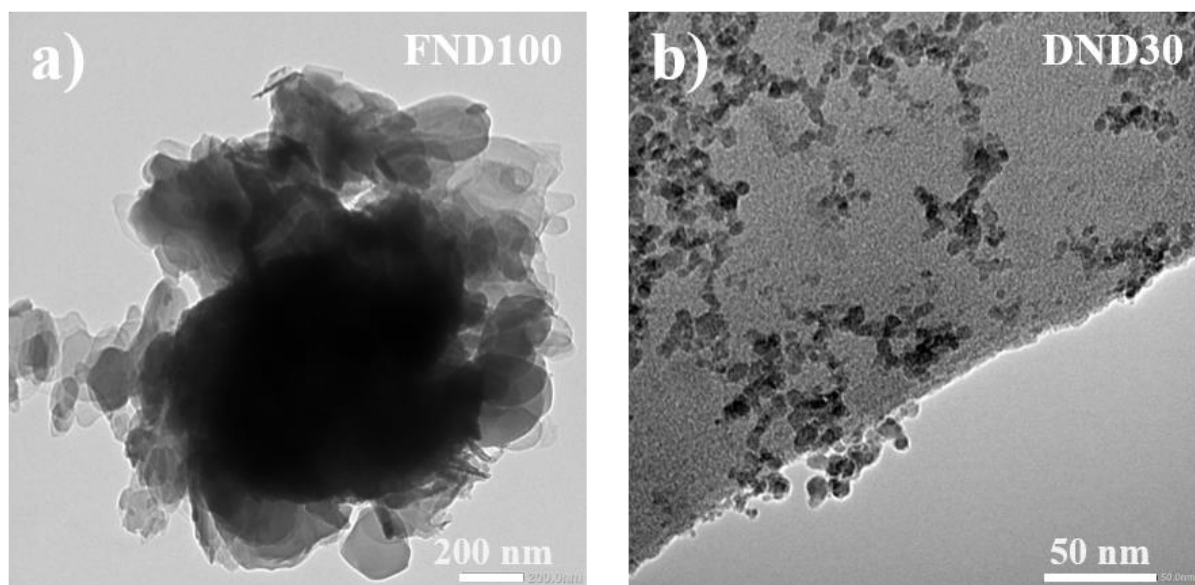

**Figure S2.** TEM micrographs of hydroxylated NDs. (a) FND100; (b) DND30.

## Supplementary Information

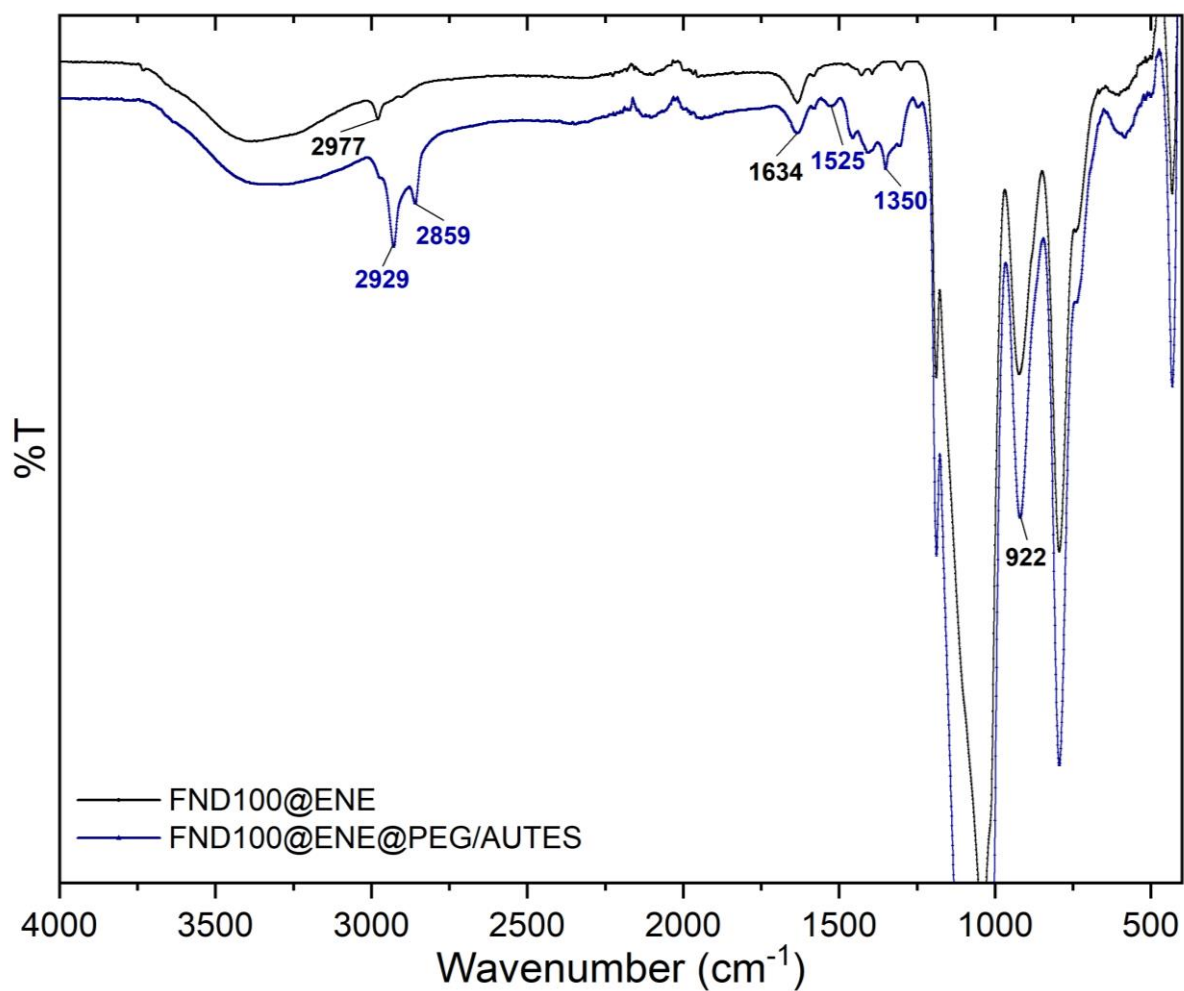

**Figure S3.** Infrared spectra of FND100@ENE and FND100@ENE@PEG/AUTES PMO NPs.

### References

1. Ma, Y.; Rohlfing, M.; Gali, A. Excited states of the negatively charged nitrogen-vacancy color center in diamond. *Physical Review B* **2010**, *81*, 041204, doi:10.1103/PhysRevB.81.041204.
